# Supplementary material for: Development of a Robust Read-Across Model for the Prediction of Biological Potency of Novel Peroxisome Proliferator-Activated Receptor Delta Agonists
Source: MDPI journal article supplement (doi:10.3390/ijms25105216), 2024-05-10
Supplement: s1 [file s1]

## Supplementary Information

**Table S1:** List of the 11 most significant molecular descriptors selected for model development.

| Descriptor ID | Mold2 Descriptor                                                                                        | Description                                                                                                                                                                                                                                                                                                                                                                                                                                                       |
|---------------|---------------------------------------------------------------------------------------------------------|-------------------------------------------------------------------------------------------------------------------------------------------------------------------------------------------------------------------------------------------------------------------------------------------------------------------------------------------------------------------------------------------------------------------------------------------------------------------|
| D034          | Number of Sulphur                                                                                       | Number of sulphur atoms in the molecule                                                                                                                                                                                                                                                                                                                                                                                                                           |
| D195          | Maximal valence vertex electro-topological positive variation                                           | <p>The maximum positive value of <math>\Delta I_i</math>, where <math>\Delta I_i &gt; 0</math> is the field effect on the <math>i</math>th atom due to the perturbation of the intrinsic state of the <math>i</math>th atom by all other atoms. <math>d_{ij}</math> refers to the topological distance between the <math>i</math>th and <math>j</math>th atom</p> $\Delta I_i = \sum_{j=1}^n \frac{I_i - I_j}{(d_{ij} + 1)^2}$                                    |
| D236          | Kier 2-path index                                                                                       | Kier shape descriptor ( $\kappa$ ), a topological shape index (derived from the Kier shape indices) defined in terms of the number of graph vertices and the number of paths $mP$ with fixed length ( $m=2$ ) in the H-depleted molecular graph                                                                                                                                                                                                                   |
| D280          | Total information content order-5 index                                                                 | The $m$ th order ( $m=5$ ) $TIC_m$ represents a measure of the graph complexity, and it is defined as $A$ (the number of graph vertices) times $IC_m$ (neighborhood Information Content) $TIC_m = A \cdot IC_m$                                                                                                                                                                                                                                                   |
| D301          | Maximum eigenvalue weighted by Heteroatoms and Multiple bonds Matrix                                    | <p>Max eigenvalue - Modified (symmetric weighted) distance matrix accounting contemporarily for the presence of heteroatoms and multiple bonds in the molecule:</p> $[ZD]_{ij} \{d_{ij}(Z, \pi^*), \text{ if } i \neq j \quad 1 - \frac{Z_c}{Z_i}, \text{ if } i = j$ <p><math>d_{ij}(Z, \pi^*)</math> is a weighted topological distance, <math>Z_c</math> and <math>Z_i</math> are the atomic numbers of the carbon and <math>i</math>th atoms respectively</p> |
| D312          | Sum eigenvalue weighted by electronegativity Pauling-Scale distance matrix                              | A spectral topochemical index that describes the alkyl groups. It is the sum of geometric means of the eigenvalues of the $^aA(\chi^{PA})$ augmented adjacency matrix weighted by the Pauling electronegativity scale ( $\chi^{PA}$ )                                                                                                                                                                                                                             |
| D375          | Sum of topological distance between the vertices O and S                                                | The sum of the distances ( $\sigma_i$ ) of all the other atoms to a given atom, where $d_{ij}$ is the topological distance between O and S atoms $\sigma_i \equiv \sum_{j=1}^A d_{ij}$                                                                                                                                                                                                                                                                            |
| D377          | Sum of topological distance between the vertices O and F                                                | The sum of the distances ( $\sigma_i$ ) of all the other atoms to a given atom, where $d_{ij}$ is the topological distance between O and F atoms $\sigma_i \equiv \sum_{j=1}^A d_{ij}$                                                                                                                                                                                                                                                                            |
| D437          | Topological structure autocorrelation length-7 weighted by atomic Sanderson electronegativities (ATSe7) | <p>Broto-Moreau spatial autocorrelation descriptors (ATS7) here weighted by atomic Sanderson electronegativities:</p> $ATS_{7,e} = \frac{1}{2} \cdot \sum_{i=1}^n \sum_{j=1}^n w_i \cdot w_j \cdot \delta(d_{ij}; 7)$                                                                                                                                                                                                                                             |
| D573          | Highest eigenvalue from Burden matrix weighted by van der Waals order 2                                 | A Chemically Intuitive Molecular (CIM) index, the second largest positive eigenvalue of a modified connectivity matrix (Burden matrix B being a H-depleted molecular graph), determined by solving the general eigenvalue equation:                                                                                                                                                                                                                               |
| D746          | Number of group H attached to C0(sp3) no X attached to next C                                           | Number of Hydrogen groups attached next to a $sp^3$ carbon atom where no other atoms were attached next to the Carbon atom                                                                                                                                                                                                                                                                                                                                        |

**Table S2:** List of the 41 compounds comprising the test set, the molecular descriptors' values and the obtained predictions using the proposed workflow.

| CID      | D034 | D195 | D236  | D280   | D301   | D312 | D375 | D377 | D437   | D573  | D746 | Bind.<br>Affin.* | Actual   | Predicti<br>on |
|----------|------|------|-------|--------|--------|------|------|------|--------|-------|------|------------------|----------|----------------|
| 44626583 | 2    | 3.78 | 11.82 | 260.88 | 172.57 | 1.48 | 83   | 0    | 118.51 | 24.71 | 1    | -9.0             | Inactive | Inactive       |
| 44626585 | 2    | 3.81 | 11.15 | 241.79 | 154.67 | 1.48 | 77   | 0    | 113.84 | 24.73 | 1    | -8.8             | Inactive | Inactive       |
| 44626888 | 1    | 4.66 | 13.58 | 307.89 | 249.34 | 2.80 | 46   | 234  | 164.47 | 23.20 | 2    | -9.5             | Active   | Active         |
| 44626689 | 1    | 3.75 | 11.56 | 251.83 | 184.81 | 1.73 | 46   | 0    | 135.24 | 23.20 | 1    | -9.1             | Active   | Active         |
| 44626691 | 2    | 3.78 | 11.82 | 259.73 | 172.97 | 1.48 | 82   | 0    | 131.80 | 24.91 | 1    | -8.8             | Inactive | Inactive       |
| 44626789 | 0    | 3.73 | 11.30 | 249.08 | 191.03 | 1.97 | 0    | 0    | 136.96 | 23.15 | 1    | -9.2             | Active   | Active         |
| 44626791 | 1    | 3.76 | 11.56 | 259.73 | 179.15 | 1.73 | 42   | 0    | 133.53 | 23.26 | 1    | -9.0             | Inactive | Active         |
| 46878727 | 2    | 3.69 | 14.80 | 293.36 | 243.36 | 1.93 | 119  | 0    | 138.58 | 24.71 | 0    | -8.6             | Inactive | Inactive       |
| 46878728 | 2    | 3.70 | 14.08 | 276.93 | 221.83 | 1.93 | 111  | 0    | 129.67 | 24.71 | 0    | -8.3             | Inactive | Inactive       |
| 46878729 | 2    | 3.71 | 13.37 | 258.70 | 201.23 | 1.93 | 103  | 0    | 118.11 | 24.71 | 0    | -8.4             | Inactive | Inactive       |
| 44626990 | 1    | 4.69 | 13.32 | 311.93 | 258.75 | 2.96 | 49   | 243  | 156.41 | 23.20 | 1    | -10.4            | Active   | Active         |
| 46878777 | 2    | 3.77 | 12.02 | 242.94 | 170.79 | 1.67 | 83   | 0    | 109.52 | 24.71 | 0    | -8.9             | Inactive | Inactive       |
| 46878780 | 2    | 3.77 | 12.02 | 242.55 | 171.20 | 1.67 | 82   | 0    | 117.56 | 24.91 | 0    | -8.7             | Active   | Inactive       |
| 46878843 | 1    | 3.75 | 11.75 | 242.55 | 177.38 | 1.92 | 42   | 0    | 119.27 | 23.28 | 0    | -9.5             | Inactive | Inactive       |
| 44627297 | 1    | 3.58 | 8.43  | 189.97 | 121.95 | 1.21 | 33   | 0    | 81.61  | 23.20 | 2    | -9.1             | Inactive | Inactive       |
| 44627192 | 1    | 4.52 | 11.13 | 251.60 | 194.77 | 2.87 | 39   | 195  | 127.82 | 23.15 | 1    | -9.6             | Active   | Active         |
| 44627302 | 1    | 4.57 | 11.97 | 275.85 | 212.89 | 3.13 | 46   | 234  | 134.24 | 23.15 | 1    | -9.9             | Active   | Active         |
| 44627409 | 1    | 4.67 | 8.93  | 197.97 | 150.29 | 2.29 | 33   | 183  | 85.89  | 23.20 | 1    | -10.1            | Inactive | Inactive       |
| 44627304 | 1    | 4.62 | 12.84 | 299.06 | 235.01 | 3.13 | 46   | 234  | 150.48 | 23.15 | 1    | -9.8             | Active   | Active         |
| 44627306 | 1    | 4.68 | 13.24 | 316.51 | 259.36 | 3.29 | 49   | 243  | 153.46 | 23.15 | 1    | -10.4            | Active   | Active         |
| 44627413 | 0    | 4.49 | 10.92 | 255.30 | 203.49 | 2.95 | 0    | 219  | 130.87 | 23.15 | 1    | -9.9             | Active   | Active         |
| 44627300 | 1    | 3.61 | 8.64  | 195.90 | 123.02 | 1.21 | 33   | 0    | 92.47  | 23.18 | 2    | -9.5             | Inactive | Inactive       |
| 44627411 | 1    | 3.71 | 10.03 | 245.60 | 158.21 | 1.37 | 33   | 0    | 127.00 | 23.19 | 2    | -9.2             | Inactive | Inactive       |
| 44627415 | 0    | 4.55 | 11.76 | 281.65 | 221.92 | 3.21 | 0    | 258  | 137.44 | 23.15 | 1    | -9.9             | Active   | Active         |
| 44627528 | 1    | 3.72 | 10.71 | 237.93 | 166.14 | 1.47 | 39   | 0    | 128.81 | 23.19 | 1    | -9.1             | Inactive | Inactive       |
| 44627628 | 1    | 3.72 | 10.26 | 219.89 | 155.88 | 1.40 | 33   | 0    | 123.70 | 23.36 | 1    | -9.1             | Active   | Inactive       |
| 11678481 | 0    | 4.60 | 12.62 | 305.01 | 244.29 | 3.21 | 0    | 258  | 153.68 | 23.15 | 1    | -9.9             | Inactive | Active         |
| 44627417 | 0    | 4.65 | 13.03 | 323.28 | 267.69 | 3.37 | 0    | 267  | 156.59 | 23.15 | 1    | -10.9            | Active   | Active         |
| 44627531 | 1    | 5.05 | 11.21 | 226.91 | 196.63 | 2.54 | 40   | 219  | 122.84 | 23.22 | 0    | -9.7             | Inactive | Inactive       |
| 44627729 | 1    | 5.08 | 11.43 | 257.25 | 203.34 | 2.54 | 40   | 219  | 138.96 | 23.22 | 1    | -10.3            | Active   | Inactive       |
| 44627730 | 1    | 5.39 | 11.43 | 264.76 | 198.95 | 2.54 | 40   | 204  | 144.23 | 23.22 | 1    | -9.4             | Active   | Inactive       |
| 44627839 | 1    | 4.59 | 12.05 | 261.83 | 213.67 | 2.80 | 46   | 234  | 137.19 | 23.20 | 1    | -9.9             | Active   | Active         |
| 44627842 | 1    | 3.77 | 11.95 | 261.81 | 190.37 | 1.92 | 46   | 0    | 136.41 | 23.38 | 1    | -9.1             | Active   | Active         |
| 44628050 | 0    | 3.72 | 10.85 | 242.89 | 180.23 | 1.91 | 0    | 0    | 131.53 | 23.19 | 1    | -9.4             | Active   | Active         |
| 44626478 | 0    | 5.34 | 11.18 | 262.00 | 206.08 | 2.79 | 0    | 222  | 145.64 | 23.15 | 1    | -10.0            | Inactive | Active         |
| 44627731 | 1    | 5.09 | 11.45 | 271.05 | 208.14 | 2.29 | 32   | 174  | 139.68 | 23.22 | 2    | -9.6             | Active   | Active         |
| 44627943 | 1    | 3.81 | 12.35 | 272.67 | 225.14 | 1.47 | 40   | 0    | 148.96 | 23.31 | 1    | -10.4            | Active   | Active         |
| 44626480 | 0    | 3.75 | 12.00 | 284.87 | 205.54 | 1.71 | 0    | 0    | 148.30 | 23.15 | 4    | -9.6             | Active   | Active         |
| 44626586 | 0    | 3.76 | 10.93 | 279.85 | 206.16 | 1.88 | 0    | 0    | 144.07 | 23.19 | 1    | -10.6            | Active   | Active         |
| 44627847 | 1    | 5.08 | 11.00 | 238.01 | 190.56 | 2.48 | 30   | 168  | 115.64 | 23.38 | 0    | -10.1            | Inactive | Inactive       |
| 44626587 | 0    | 3.74 | 11.25 | 246.22 | 186.57 | 2.10 | 0    | 0    | 132.70 | 23.20 | 1    | -9.6             | Active   | Active         |

\* Binding affinities are calculated in kcal/mol

## S1. Dissemination of the predictive model using the QMRF reporting template

|           |                                                                       |                                                                                                                                                                                                                                                                                                                                                                                                                                                                                                                            |
|-----------|-----------------------------------------------------------------------|----------------------------------------------------------------------------------------------------------------------------------------------------------------------------------------------------------------------------------------------------------------------------------------------------------------------------------------------------------------------------------------------------------------------------------------------------------------------------------------------------------------------------|
| <b>1.</b> | <b>QSAR identifier</b>                                                |                                                                                                                                                                                                                                                                                                                                                                                                                                                                                                                            |
| 1.1.      | QSAR identifier (title)                                               | Development of a robust read across model for the prediction of biological potency of novel PPAR $\delta$ agonists with Isalos Analytics Platform                                                                                                                                                                                                                                                                                                                                                                          |
| 1.2.      | Other related models                                                  | Not Applicable                                                                                                                                                                                                                                                                                                                                                                                                                                                                                                             |
| 1.3.      | Software coding the model                                             | Isalos Analytics Platform ( <a href="https://isalos.novamechanics.com/">https://isalos.novamechanics.com/</a> )<br>The model was implemented as a web application, available at: <a href="https://www.enaloscloud.novamechanics.com/scenarios/ppardelta/">https://www.enaloscloud.novamechanics.com/scenarios/ppardelta/</a>                                                                                                                                                                                               |
| <b>2.</b> | <b>General information</b>                                            |                                                                                                                                                                                                                                                                                                                                                                                                                                                                                                                            |
| 2.0       | Abstract                                                              | A robust predictive model was developed using 136 novel peroxisome proliferator-activated receptor delta (PPAR $\delta$ ) agonists, a distinct subtype of lipid-activated transcription factors of the nuclear receptor superfamily that regulate target genes by binding to characteristic sequences of DNA bases. The model employs various structural descriptors and docking calculations and provides predictions of the biological activity of PPAR $\delta$ agonists, following the criteria established by (OECD). |
| 2.1.      | Date of QMRF                                                          | 30 November 2023                                                                                                                                                                                                                                                                                                                                                                                                                                                                                                           |
| 2.2.      | QMRF author(s) and contact details                                    | Maria Antoniou – antoniou@novamechanics.com<br>Antreas Afantitis – afantitis@novamechanics.com                                                                                                                                                                                                                                                                                                                                                                                                                             |
| 2.3.      | Date of QMRF update(s)                                                | Not Applicable                                                                                                                                                                                                                                                                                                                                                                                                                                                                                                             |
| 2.4.      | QMRF update(s)                                                        | Not Applicable                                                                                                                                                                                                                                                                                                                                                                                                                                                                                                             |
| 2.5.      | Model developer(s) and contact details                                | Maria Antoniou – antoniou@novamechanics.com<br>Konstantinos Papavasileiou – papavasileiou@novamechanics.com                                                                                                                                                                                                                                                                                                                                                                                                                |
| 2.6.      | Date of model development and/or publication                          | Date of model development: July 2023.                                                                                                                                                                                                                                                                                                                                                                                                                                                                                      |
| 2.7.      | Reference(s) to main scientific papers and/or software package        | Development of a Robust Read-Across Model for the Prediction of Biological Potency of Novel PPAR $\delta$ Agonists, Int. J. Mol. Sci.                                                                                                                                                                                                                                                                                                                                                                                      |
| 2.8.      | Availability of information about the model                           | The model is non-proprietary: full description of the model algorithm is available; training and test sets are available as supplementary material of original research article. The model is implemented in a public web service and the full dataset with data enrichment attributes is publicly available at the following DOI: <a href="https://doi.org/10.5281/zenodo.10566883">https://doi.org/10.5281/zenodo.10566883</a>                                                                                           |
| 2.9.      | Availability of another QMRF for exactly the same model               | Not Applicable                                                                                                                                                                                                                                                                                                                                                                                                                                                                                                             |
| <b>3</b>  | <b>Defining the endpoint - OECD Principle 1: "A DEFINED ENDPOINT"</b> |                                                                                                                                                                                                                                                                                                                                                                                                                                                                                                                            |
| 3.1.      | Species                                                               | Small Molecules                                                                                                                                                                                                                                                                                                                                                                                                                                                                                                            |
| 3.2.      | Endpoint                                                              | Prediction of the potency class ('Active' or 'Inactive') of small molecules to peroxisome proliferator-activated receptor delta (PPAR $\delta$ )                                                                                                                                                                                                                                                                                                                                                                           |
| 3.3.      | Comment on endpoint                                                   | Classified into two clusters based on the logarithmically transformed EC <sub>50</sub> values of the initial compounds.                                                                                                                                                                                                                                                                                                                                                                                                    |
| 3.4.      | Endpoint units                                                        | None                                                                                                                                                                                                                                                                                                                                                                                                                                                                                                                       |
| 3.5.      | Dependent variable                                                    | Two potency categories, 'Active' and 'Inactive'                                                                                                                                                                                                                                                                                                                                                                                                                                                                            |

|          |                                                                               |                                                                                                                                                                                                                                                                                                                                                                                                                                                                                                                                                                                                                                                                                                                                                                                                                                                                                                                                                                                                                                                                                                                                       |
|----------|-------------------------------------------------------------------------------|---------------------------------------------------------------------------------------------------------------------------------------------------------------------------------------------------------------------------------------------------------------------------------------------------------------------------------------------------------------------------------------------------------------------------------------------------------------------------------------------------------------------------------------------------------------------------------------------------------------------------------------------------------------------------------------------------------------------------------------------------------------------------------------------------------------------------------------------------------------------------------------------------------------------------------------------------------------------------------------------------------------------------------------------------------------------------------------------------------------------------------------|
| 3.6.     | Experimental protocol                                                         | <p>The dataset was sourced from the PubChem BioAssay repository, under the AID 469785. The bioassay evaluates the agonist activity at human PPAR<math>\delta</math> ligand binding domain and includes 136 novel oxazole-based compounds tested in human 293T cells co-transferred with Gal4-DBD via a process called luciferase transactivation. Each compound in the dataset is accompanied by measurements of the half maximal effective concentration (EC<sub>50</sub>), a standardized type of potency.</p> <p>More information on the experimental protocol can be found in: Epple, R.; Cow, C.; Xie, Y.; Azimioara, M.; Russo, R.; Wang, X.; Wityak, J.; Karanewsky, D.S.; Tuntland, T.; Nguyễn-Trần, V.T.B.; et al. Novel Bisaryl Substituted Thiazoles and Oxazoles as Highly Potent and Selective Peroxisome Proliferator-Activated Receptor <math>\delta</math> Agonists. J Med Chem 2010, 53, 77–105, <a href="https://doi.org/10.1021/jm9007399">https://doi.org/10.1021/jm9007399</a></p>                                                                                                                               |
| 3.7.     | Endpoint data quality and variability                                         | <p>The log-transformed measurements of EC<sub>50</sub> are partitioned into two clusters that represent two activity classes with a k-means clustering technique. Therefore, each compound is assigned a class label and the coverage of the two clusters, 'Active' and 'Inactive', is relatively balanced. The 'Inactive' category has a centroid of log(EC<sub>50</sub>)=0.224 and the 'Active' category has a centroid of log(EC<sub>50</sub>)=-1.674.</p>                                                                                                                                                                                                                                                                                                                                                                                                                                                                                                                                                                                                                                                                         |
| <b>4</b> | <b>Defining the algorithm - OECD Principle 2 : "AN UNAMBIGUOUS ALGORITHM"</b> |                                                                                                                                                                                                                                                                                                                                                                                                                                                                                                                                                                                                                                                                                                                                                                                                                                                                                                                                                                                                                                                                                                                                       |
| 4.1.     | Type of model                                                                 | Type of model: Non-parametric, supervised learning classification model                                                                                                                                                                                                                                                                                                                                                                                                                                                                                                                                                                                                                                                                                                                                                                                                                                                                                                                                                                                                                                                               |
| 4.2.     | Explicit algorithm                                                            | k-Nearest Neighbours algorithm (k = 8). This algorithm identifies the k-number of training data points that are 'closest' to the unclassified instance in the test set. Distances are assigned based on Euclidean distances, and inverted distance is used as weighting factor for the k nearest points.                                                                                                                                                                                                                                                                                                                                                                                                                                                                                                                                                                                                                                                                                                                                                                                                                              |
| 4.3.     | Descriptors in the model                                                      | <p>Molecular descriptors refer to descriptors based on the one-dimensional and two-dimensional structure of a compound:</p> <ol style="list-style-type: none"> <li>1. Number of sulfur atoms [D034]</li> <li>2. Maximum valence vertex electro- topological positive variation [D195]</li> <li>3. Kier 2-path index236 Kier 2-path index [D236]</li> <li>4. Total information content order-5 index [D280]</li> <li>5. Maximum eigenvalue weighted by heteroatoms and multiple bonds matrix [D301]</li> <li>6. Sum eigenvalue weighted by electronegativity Pauling-Scale distance [D312]</li> <li>7. Sum of topological distance between the vertices O and S [D375]</li> <li>8. Sum of topological distance between the vertices O and F [D377]</li> <li>9. Topological structure autocorrelation length-7 weighted by atomic Sanderson electronegativities (ATSe7) [D437]</li> <li>10. Highest eigenvalue from Burden matrix weighted by Van der Waals order-2 [D573]</li> <li>11. Number of group H attached to C0(sp3) no X attached next to C [D736]</li> <li>12. Binding affinity calculations of the 136 compounds</li> </ol> |
| 4.4.     | Descriptor selection                                                          | <p>Feature selection was performed to select the most important variables from an initial pool of 777 molecular descriptors, using low-variance filters and column removal based on correlations between variables. The 'BestFirst (forward direction)' approach uses a greedy algorithm that iteratively adds or removes features to find the successor in all the tested combinations. 11 descriptors were selected, along with binding affinity calculations, a descriptor that was manually selected.</p>                                                                                                                                                                                                                                                                                                                                                                                                                                                                                                                                                                                                                         |
| 4.5.     | Algorithm and descriptor generation                                           | <p>All of the 777 molecular descriptors were generated using the 'EnalosMold2' KNIME node that employs the Mold2.exe executable and an SDF file to calculate molecular descriptors.</p>                                                                                                                                                                                                                                                                                                                                                                                                                                                                                                                                                                                                                                                                                                                                                                                                                                                                                                                                               |

|          |                                                                                                                                                                 |                                                                                                                                                                                                                                                                                                                                                                                                                                                                                                                                                                                                                                                                                                                                                                                     |
|----------|-----------------------------------------------------------------------------------------------------------------------------------------------------------------|-------------------------------------------------------------------------------------------------------------------------------------------------------------------------------------------------------------------------------------------------------------------------------------------------------------------------------------------------------------------------------------------------------------------------------------------------------------------------------------------------------------------------------------------------------------------------------------------------------------------------------------------------------------------------------------------------------------------------------------------------------------------------------------|
| 4.6.     | Software name and version for descriptor generation                                                                                                             | Mold2 is a software developed by the National Center for Toxicological Research (NCTR) that calculates a large and diverse set of 777 molecular descriptors encoding two-dimensional chemical structure information. More information on the Mold2 software can be found in <a href="https://www.fda.gov/science-research/bioinformatics-tools/mold2">https://www.fda.gov/science-research/bioinformatics-tools/mold2</a>                                                                                                                                                                                                                                                                                                                                                           |
| 4.7.     | Chemicals/Descriptors ratio                                                                                                                                     | 136 chemicals:12 descriptors                                                                                                                                                                                                                                                                                                                                                                                                                                                                                                                                                                                                                                                                                                                                                        |
| <b>5</b> | <b>Defining the applicability domain - OECD Principle 3: "A DEFINED DOMAIN OF APPLICABILITY"</b>                                                                |                                                                                                                                                                                                                                                                                                                                                                                                                                                                                                                                                                                                                                                                                                                                                                                     |
| 5.1.     | Description of the applicability domain of the model                                                                                                            | <p>The applicability domain is defined by fixed boundaries, the APD threshold, calculated by considering Euclidean distances between all molecules in the training set. If the domain of a molecule is beyond this threshold, then the prediction is considered unreliable.</p> <p>More information on the applicability domain methodology can be found in: G. Melagraki, A. Afantitis, H. Sarimveis, P.A. Koutentis, O. Igglessi – Markopoulou, G. Kollias "In Silico Exploration for Identifying Structure–Activity Relationship of MEK Inhibition and Oral Bioavailability for Isothiazole Derivatives" Chemical Biology and Drug Design 2010; 76: 397–406, <a href="https://doi.org/10.1111/j.1747-0285.2010.01029.x">https://doi.org/10.1111/j.1747-0285.2010.01029.x</a></p> |
| 5.2.     | Method used to assess the applicability domain                                                                                                                  | <p>The distance of a test molecule to its nearest neighbour in the training set in compared to the pre-defined APD threshold, <math>APD = 'd' + 'stdev' * z</math>.</p> <ul style="list-style-type: none"> <li>First, the average Euclidean distances between all pairs of training data is calculated and then the set of distances that were lower than the average is formulated.</li> <li>The 'd' and 'stdev' values are finally determined as the average and standard deviation of all distances included in the remaining set.</li> <li>z is an empirical parameter with a value of 0.5</li> </ul>                                                                                                                                                                           |
| 5.3.     | Software name and version for applicability domain assessment                                                                                                   | 'Domain-APD' node from the Enalos+ extension for the KNIME Analytics Platform (version 4.7.5)                                                                                                                                                                                                                                                                                                                                                                                                                                                                                                                                                                                                                                                                                       |
| 5.4.     | Limits of applicability                                                                                                                                         | APD threshold=3.682, If the domain of a molecule is lower than this threshold, then the prediction is considered reliable. The reliability percentage of the testing set equals 100%.                                                                                                                                                                                                                                                                                                                                                                                                                                                                                                                                                                                               |
| <b>6</b> | <b>Defining goodness-of-fit and robustness (internal validation) – OECD Principle 4: "APPROPRIATE MEASURES OF GOODNESS-OF-FIT, ROBUSTNESS AND PREDICTIVITY"</b> |                                                                                                                                                                                                                                                                                                                                                                                                                                                                                                                                                                                                                                                                                                                                                                                     |
| 6.1.     | Availability of the training set                                                                                                                                | It is available but not attached. The training set can be derived from the supplementary material of the publication. The whole set of the filtered molecular descriptors can be accessed via Zenodo ( <a href="https://doi.org/10.5281/zenodo.10566883">https://doi.org/10.5281/zenodo.10566883</a> ).                                                                                                                                                                                                                                                                                                                                                                                                                                                                             |
| 6.2.     | Available information for the training set                                                                                                                      | Available information for the training set:<br>a) SMILES notations<br>b) InChI and InChIKeys codes<br>c) PubChem Compound ID and ChEMBL ID.                                                                                                                                                                                                                                                                                                                                                                                                                                                                                                                                                                                                                                         |
| 6.3.     | Data for each descriptor variable for the training set                                                                                                          | The descriptor values of the training set are available via Zenodo.                                                                                                                                                                                                                                                                                                                                                                                                                                                                                                                                                                                                                                                                                                                 |
| 6.4.     | Data for the dependent variable for the training set                                                                                                            | The dependent variable values of the training set are available via Zenodo.                                                                                                                                                                                                                                                                                                                                                                                                                                                                                                                                                                                                                                                                                                         |
| 6.5.     | Other information about the training set                                                                                                                        | The Kennard-Stone algorithm was used for the partitioning of the initial dataset into two representative subsets, the training and the test set. The training set percentage was set at 70%, thus it consists of 95 small molecules selected for model development. Also, the training set includes 40 molecules characterised as 'Inactive', and 55 molecules characterised as 'Active'.                                                                                                                                                                                                                                                                                                                                                                                           |

|          |                                                                                                                                                |                                                                                                                                                                                                                                                                                                                                                                                                                                               |
|----------|------------------------------------------------------------------------------------------------------------------------------------------------|-----------------------------------------------------------------------------------------------------------------------------------------------------------------------------------------------------------------------------------------------------------------------------------------------------------------------------------------------------------------------------------------------------------------------------------------------|
| 6.6.     | Pre-processing of data before modelling                                                                                                        | <ul style="list-style-type: none"> <li>Removal of columns: Filtering of columns that have the same values at a percentage equal or higher than 70%.</li> <li>Low Variance filter: Cutoff limit of 20% to filter out columns.</li> <li>Z-score normalization: Gaussian distribution.</li> <li>Separating the compounds into two clusters (k-means clustering)</li> <li>Feature selection was performed as described in Section 4.4.</li> </ul> |
| 6.7.     | Statistics for goodness-of-fit                                                                                                                 | Confusion matrix, Accuracy, Sensitivity, Precision, F1-score, Cohen's kappa                                                                                                                                                                                                                                                                                                                                                                   |
| 6.8.     | Robustness - Statistics obtained by leave-one-out cross-validation                                                                             | Robustness statistics obtained by leave-one-out cross validation on the training set:<br>Accuracy=76.8%, Sensitivity=80%, Precision=80%, F1-score=80%, Cohen's kappa=0.525                                                                                                                                                                                                                                                                    |
| 6.9.     | Robustness - Statistics obtained by leave-many-out cross-validation                                                                            | Robustness statistics obtained by five-fold cross validation on the training set:<br>Accuracy=80%, Sensitivity=83.6%, Precision=82.1%, F1-score=82.9%, Cohen's kappa=0.588                                                                                                                                                                                                                                                                    |
| 6.10.    | Robustness - Statistics obtained by Y-scrambling                                                                                               | Five Y-randomizations returned accuracies of 68.3%, 39.0%, 56.1%, 51.2%, 46.3%                                                                                                                                                                                                                                                                                                                                                                |
| 6.11.    | Robustness - Statistics obtained by bootstrap                                                                                                  | Not Applicable                                                                                                                                                                                                                                                                                                                                                                                                                                |
| 6.12.    | Robustness - Statistics obtained by other methods                                                                                              | Not Applicable                                                                                                                                                                                                                                                                                                                                                                                                                                |
| <b>7</b> | <b>Defining predictivity (external validation) – OECD Principle 4: “APPROPRIATE MEASURES OF GOODNESS-OF-FIT, ROBUSTENESS AND PREDICTIVITY”</b> |                                                                                                                                                                                                                                                                                                                                                                                                                                               |
| 7.1.     | Availability of the external validation set                                                                                                    | It is available but not attached. The test set is available as a table as supplementary material of the publication. The table includes the data enhancement attributes of the test set, and more information can be accessed via Zenodo ( <a href="https://doi.org/10.5281/zenodo.10566883">https://doi.org/10.5281/zenodo.10566883</a> ).                                                                                                   |
| 7.2.     | Available information for the external validation set                                                                                          | Available information for the training set:<br>a) SMILES notations<br>b) InChI and InChIKeys codes<br>c) PubChem Compound ID and ChEMBL ID.                                                                                                                                                                                                                                                                                                   |
| 7.3.     | Data for each descriptor variable for the external validation set                                                                              | The descriptor values of the test set are available via Zenodo.                                                                                                                                                                                                                                                                                                                                                                               |
| 7.4.     | Data for the dependent variable for the external validation set                                                                                | The dependent variable values of the test set are available via Zenodo.                                                                                                                                                                                                                                                                                                                                                                       |
| 7.5.     | Other information about the external validation set                                                                                            | 41 out of the 136 initial compounds were included in the test set. The test set was not involved in the model development, but it was used solely for validating purposes. Also, the test set includes 18 molecules characterised as 'Inactive', and 23 molecules characterised as 'Active'.                                                                                                                                                  |
| 7.6.     | Experimental design of test set                                                                                                                | The initial dataset was split into a 70:30 ratio with the Kennard-Stone algorithm for the separation into two representative subsets.                                                                                                                                                                                                                                                                                                         |
| 7.7.     | Predictivity - Statistics obtained by external validation                                                                                      | True Positives = 20, False Positives = 2, True Negatives = 16, False Negatives = 3, Accuracy = 87.8%, Sensitivity = 87.0%, Precision = 90.9%, F1-score = 88.9%, Matthew's correlation coefficient = 0.755, Cohen's kappa = 0.754                                                                                                                                                                                                              |
| 7.8.     | Predictivity - Assessment of the external validation set                                                                                       | The external validation set is sufficiently large and representative of the original data. It was further assessed using the applicability domain limits. The external validation subset (test set) is 30% of the initial dataset, and all the instances of the test sets fall within the domain of applicability.                                                                                                                            |
| 7.9.     | Comments on the external validation of the model                                                                                               | Z-score normalization of the test set is applied based on the calculations on the training set.                                                                                                                                                                                                                                                                                                                                               |
| <b>8</b> | <b>Providing a mechanistic interpretation - OECD Principle 5: “A MECHANISTIC INTERPRETATION, IF POSSIBLE”</b>                                  |                                                                                                                                                                                                                                                                                                                                                                                                                                               |

|          |                                                        |                                                                                                                                                                                                                                                                                                                                                                                                                                                                                                                                                                                                                                                                                                                                                                                                                                                                                                                                                                                                                                                                                                                                                                                                                                                                                                                                                                                                                                                                                                                                                                                                                                                                                                                                                                                                                                                                                          |
|----------|--------------------------------------------------------|------------------------------------------------------------------------------------------------------------------------------------------------------------------------------------------------------------------------------------------------------------------------------------------------------------------------------------------------------------------------------------------------------------------------------------------------------------------------------------------------------------------------------------------------------------------------------------------------------------------------------------------------------------------------------------------------------------------------------------------------------------------------------------------------------------------------------------------------------------------------------------------------------------------------------------------------------------------------------------------------------------------------------------------------------------------------------------------------------------------------------------------------------------------------------------------------------------------------------------------------------------------------------------------------------------------------------------------------------------------------------------------------------------------------------------------------------------------------------------------------------------------------------------------------------------------------------------------------------------------------------------------------------------------------------------------------------------------------------------------------------------------------------------------------------------------------------------------------------------------------------------------|
| 8.1.     | Mechanistic basis of the model                         | The 11 descriptors that better correlate the molecular characteristics of the compounds to the biological potency were selected among a pool of 777 variables and their influence on the end point was analysed. D280 (TCIm) is a variable that quantifies the complexity of a molecular graph, where higher values amount to higher effective concentrations. Also, the selected Broto-Moreau autocorrelation descriptor D437 (ATSe,7) is weighted by atomic electronegativities, and higher electronegativity distribution contributes to the activity of PPAR $\delta$ . D236 is the Kier-shape index, which encloses information on the degree of star graph-likeness and the branching/flexibility of a molecule. It is a valuable descriptor in this study, since PPAR $\delta$ activation is associated with flexible compounds and less pliable ones have lower potency.                                                                                                                                                                                                                                                                                                                                                                                                                                                                                                                                                                                                                                                                                                                                                                                                                                                                                                                                                                                                         |
| 8.2.     | A priori or a posteriori mechanistic interpretation    | A posteriori mechanistic interpretation: the selected descriptors' possible effect on the end point was analysed after the model development.                                                                                                                                                                                                                                                                                                                                                                                                                                                                                                                                                                                                                                                                                                                                                                                                                                                                                                                                                                                                                                                                                                                                                                                                                                                                                                                                                                                                                                                                                                                                                                                                                                                                                                                                            |
| 8.3.     | Other information about the mechanistic interpretation | Not Applicable                                                                                                                                                                                                                                                                                                                                                                                                                                                                                                                                                                                                                                                                                                                                                                                                                                                                                                                                                                                                                                                                                                                                                                                                                                                                                                                                                                                                                                                                                                                                                                                                                                                                                                                                                                                                                                                                           |
| <b>9</b> | <b>Miscellaneous information</b>                       |                                                                                                                                                                                                                                                                                                                                                                                                                                                                                                                                                                                                                                                                                                                                                                                                                                                                                                                                                                                                                                                                                                                                                                                                                                                                                                                                                                                                                                                                                                                                                                                                                                                                                                                                                                                                                                                                                          |
| 9.1.     | Comments                                               | Not Applicable                                                                                                                                                                                                                                                                                                                                                                                                                                                                                                                                                                                                                                                                                                                                                                                                                                                                                                                                                                                                                                                                                                                                                                                                                                                                                                                                                                                                                                                                                                                                                                                                                                                                                                                                                                                                                                                                           |
| 9.2.     | Bibliography                                           | <ul style="list-style-type: none"> <li>• Eppe, R.; Cow, C.; Xie, Y.; Azimioara, M.; Russo, R.; Wang, X.; Wityak, J.; Karanewsky, D. S.; Tuntland, T.; Nguyễn-Trần, V. T. B.; Cuc Ngo, C.; Huang, D.; Saez, E.; Spalding, T.; Gerken, A.; Iskandar, M.; Seidel, H. M.; Tian, S.-S. Novel Bisaryl Substituted Thiazoles and Oxazoles as Highly Potent and Selective Peroxisome Proliferator-Activated Receptor <math>\delta</math> Agonists. <i>J Med Chem</i> 2010, 53 (1), 77–105. <a href="https://doi.org/10.1021/jm9007399">https://doi.org/10.1021/jm9007399</a></li> <li>• National Center for Biotechnology Information. PubChem Bioassay Record for AID 469785, Source: ChEMBL. <a href="https://pubchem.ncbi.nlm.nih.gov/bioassay/469785">https://pubchem.ncbi.nlm.nih.gov/bioassay/469785</a></li> <li>• Mold(2), molecular descriptors from 2D structures for chemoinformatics and toxicoinformatics (Hong et al., 2008) DOI: 10.1021/ci800038f</li> <li>• NovaMechanics Ltd, “Enalos + KNIME nodes,” 2017. <a href="http://enalosplus.novamechanics.com/">http://enalosplus.novamechanics.com/</a></li> <li>• G. Melagraki, A. Afantitis, H. Sarimveis, P.A. Koutentis, O. Igglessi – Markopoulou, G. Kollias "In Silico Exploration for Identifying Structure–Activity Relationship of MEK Inhibition and Oral Bioavailability for Isothiazole Derivatives" <i>Chemical Biology and Drug Design</i> 2010; 76: 397–406, <a href="https://doi.org/10.1111/j.1747-0285.2010.01029.x">https://doi.org/10.1111/j.1747-0285.2010.01029.x</a></li> <li>• Varsou, D.-D.; Tsoumanis, A.; Papadiamantis, A. G.; Melagraki, G.; Afantitis, A. Isalos Predictive Analytics Platform: Cheminformatics, Nanoinformatics, and Data Mining Applications; 2023; pp 223–242. <a href="https://doi.org/10.1007/978-3-031-20730-3_9">https://doi.org/10.1007/978-3-031-20730-3_9</a>.</li> </ul> |
| 9.3      | Supporting information                                 | Not Applicable                                                                                                                                                                                                                                                                                                                                                                                                                                                                                                                                                                                                                                                                                                                                                                                                                                                                                                                                                                                                                                                                                                                                                                                                                                                                                                                                                                                                                                                                                                                                                                                                                                                                                                                                                                                                                                                                           |
